1           **Prevalence and Factors Associated with Puerperal Sepsis among Postnatal Women at a**  
2                                           **Tertiary Referral Hospital in Western Uganda**

3 Authors; Brenda Nabawanuka<sup>1</sup>, Moses Asiimwe<sup>1□</sup>, Pauline Irumba<sup>1</sup>, Julian Aryampa<sup>1</sup>, Wasswa  
4 George<sup>2</sup>, Michael Muhoozi<sup>3</sup>, Joy Acen<sup>4</sup>, Peterson Amumpaire<sup>4</sup>, Shamim Katusabe<sup>5</sup>, Joan Tusabe<sup>6</sup>,  
5 Epuitai Joshua<sup>7</sup>

6           **Author Affiliations**

7           1. Mountains of the Moon University, Fort Portal, Uganda

8           2. Joint Clinical Research Center, Wakiso, Uganda

9           3. Baylor College of Medicine, Kampala, Uganda

10          4. Lira University, Lira, Uganda

11          5. Infectious Disease Institute, Kampala, Uganda

12          6. Makerere University Case Western Reserve University, Kampala, Uganda

13          7. Busitema University, Jinja, Uganda

14          \* Corresponding author; Moses Asiimwe, Email: [mosease19@gmail.com](mailto:mosease19@gmail.com)

15

16

17

18

19

20

21

22

23

24

25

26

27

28

29

## 30 Abstract

31 **Background:** Puerperal sepsis remains one of the leading causes of maternal mortality and  
32 morbidity in Uganda.

33 **Aim:** This study assessed the prevalence and factors associated with puerperal sepsis among  
34 postpartum women at Fort portal Regional Referral Hospital located in western Uganda.

35 **Methods:** A cross-sectional design was employed in the study. We conducted a records review of  
36 the patient files of 180 postnatal mothers who were admitted at Fort Portal Regional Referral  
37 Hospital from 20 February, 2024 to 01 April, 2024. A data abstraction checklist was used to collect  
38 data from participant files based on strict inclusion and exclusion criteria. Data was entered in  
39 Microsoft Excel and exported to STATA17 for data analysis. Descriptive analysis and logistic  
40 regression analysis were performed to determine the prevalence of puerperal sepsis and  
41 determinants. Bivariate and multivariate logistic regression analysis was conducted for significant  
42 factors presented as Adjusted Odds Ratios (aOR) at  $p \leq 0.05$ .

43 **Results:** The median age of participants was 25.5 years (IQR=20-30) and the majority (77%) had  
44 primary education. The prevalence of postnatal sepsis was 24%. Duration of hospital stay  
45 [aOR=2.30; 95%CI (1.552-3.398);  $p < 0.001$ ], history of antepartum hemorrhage [aOR=29.09;  
46 95% CI (1.182-716.38);  $p = 0.039$ ] and Anemia [aOR=0.01; 95% CI (0.001-0.218);  $p = 0.004$ ] were  
47 identified as factors associated with puerperal sepsis among postnatal women upon multivariate  
48 logistic regression.

49 **Conclusion:** Puerperal sepsis was common in our setting. This study found that mode of delivery,  
50 duration of hospital stay, anemia, and Antepartum hemorrhage, were the determining factors  
51 contributing to puerperal sepsis, infection prevention measures during cesarean sections, and  
52 reducing the length of hospital stay would prove to be beneficial in the prevention of sepsis.

## 53 Key Words

54 Puerperal Sepsis; Postnatal Women; Postpartum Mothers

55

## 56 Background

57 The World Health Organization (WHO) defines puerperal sepsis (PS) as infection of the genital  
58 tract occurring at any time between the onset of rupture of membranes or labor and the 42 days  
59 after delivery in which two or more of the following are present: pelvic pain, fever, abnormal  
60 vaginal discharge, abnormal smell/ foul odor discharge or delay in uterine involution.[1] Puerperal  
61 sepsis occurs when bacteria such as certain Streptococcus and Staphylococcus species colonize the  
62 genital tract or acquired nosocomial species invade the endometrium, adjacent structures, lymphatic  
63 and bloodstream and produce and infection.[2] Puerperal sepsis remains one of the most common  
64 and yet preventable causes of direct maternal death. [3, 4, 5]

65 Puerperal sepsis remains a public health concern and among the leading causes of preventable  
66 maternal death in developing countries, including Uganda.<sup>2</sup> Globally, about 75,000 maternal deaths  
67 occur annually as a result of puerperal sepsis,[6] and by 2015, 303,000 maternal deaths yearly

68 occurred of which up to 15% were associated with puerperal sepsis.[7] The prevalence of puerperal  
69 sepsis varies from country to country, with higher rates observed in poorer countries. The  
70 prevalence of puerperal sepsis is 11.6% in Asia, 9.7% in Africa, 7.7% in South America, and 7.7%  
71 in Caribbean countries.[8, 9] In Uganda, there has been a slow decline in maternal mortality ratio  
72 (MMR) between 1990 and 2010 from 550 in 1990 to 438 in 2012 and from 438 to 189 per 100000  
73 live births in 2022.[10] The prevalence of sepsis in Uganda varies in different health facilities. In  
74 Western Uganda, the prevalence of puerperal sepsis was 39%, [11] while a 12% prevalence was  
75 reported in Hoima District.[12]

76 The Sustainable Developmental Goal 3 (SDG3) aimed at reducing the maternal mortality ratio to  
77 70 deaths per 100,000 live births has not been attained. [13] Puerperal sepsis causes 10.7% of  
78 maternal deaths and it is one of the five common causes of maternal mortality worldwide after  
79 postpartum bleeding, unsafe abortion, and pregnancy-induced hypertension, puerperal sepsis is the  
80 fourth greatest cause of maternal mortality. [2, 14]

81 Common predisposing factors leading to puerperal sepsis are anemia, prolonged labor, frequent  
82 vaginal examinations in labor under unsterilized circumstances, premature rupture of membranes  
83 for prolonged period impaired immunity, cesarean section, and retained products of conception are  
84 known factors associated with puerperal sepsis.[3, 15] Although the extent of puerperal sepsis in  
85 maternity wards is poorly understood in developing countries including Uganda, puerperal sepsis  
86 is one of the top five causes of maternal mortality.[16] As of now, there is no published study has  
87 been done in Fort Portal Regional referral Hospital (FPRRH) or its catchment area to determine the  
88 prevalence of puerperal sepsis and its associated factors. The cases of puerperal sepsis in Fort Portal  
89 Regional Referral are on the rise in the hospital. Puerperal sepsis is associated with nosocomial  
90 infections, prolonged hospitalization, increasing health expenditure, antibacterial resistance, and  
91 loss of reproductive function. [17]

92 Puerperal sepsis has been a major cause of anemia, puerperal psychosis, and poor lactation leading  
93 to poor infant feeding. [18] There are no clear standardized guidelines for controlling the condition  
94 in most maternity wards at Fort Portal Regional Referral Hospital. Similarly, the factors  
95 contributing to puerperal sepsis and its preventive measures have not been studied in our setting.  
96 The available data on the occurrence of puerperal sepsis in maternity wards in Uganda is  
97 insufficient. Therefore, this study is critical in filling the knowledge gap regarding the prevalence  
98 and factors associated with puerperal sepsis among women attending the postnatal ward at Fort  
99 Portal Regional Referral Hospital. This study is also part of the baseline investigation to determine  
100 the prevalence and associated factors findings will later inform the implementation of a project to  
101 improve the quality and management of puerperal sepsis at Fort portal Regional Referral Hospital.

102 Our study determined the prevalence and factors associated with Puerperal sepsis in a regional  
103 referral Hospital in Uganda. Determining the magnitude of puerperal sepsis will help in formulating  
104 preventive measures to reduce the incidence of puerperal sepsis in the health facility. The study  
105 proposes to use the findings to develop quality improvement projects aimed at reducing the burden  
106 of puerperal sepsis in the health facility. Reducing the burden of puerperal sepsis will contribute to  
107 concerted efforts to reduce the burden of maternal morbidity and mortality in Uganda.

## 108 **Materials and methods**

### 109 **Study design and area:**

110 The study was a cross-sectional analytical study. Quantitative data was collected to determine the  
111 prevalence and factors associated with puerperal sepsis. The study site was Fort Portal Regional  
112 Referral Hospital (FRRH). This is the referral hospital for the districts in Rwenzori region,  
113 including Bundibugyo, Kabarole, Kamwenge, Kasese, Ntoroko and Kyenjojo. It is a public  
114 hospital, funded by the Uganda Ministry of Health. It is one of the 13 Regional Referral Hospitals  
115 in Uganda. It has different departments including surgical ward, maternity ward, postnatal ward,  
116 medical ward, ART clinic, and gynecology department. The gynecology department admits patients  
117 with puerperal sepsis and the hospital has a 200-bed capacity.

## 118 **Study Population**

119 The study population was mothers admitted in the postnatal ward of FPRRH in a period of the  
120 previous six months prior to data collection. These mothers were identified from the hospital  
121 database and hospital records using the inpatient identification number provided at admission. We  
122 included into this study only the patient files that had complete information necessary.

## 123 **Sample size and sampling procedures**

124 In this study, all the postnatal hospital records for the previous six months prior data collection were  
125 identified and we selected all files that fulfilled the inclusion and exclusion criteria from where a  
126 total of 180 participant files were selected for the study. All data was anonymized and de-identified.  
127 Records with encrypted identities were checked, and duplicated records or those with incomplete  
128 data were excluded from analysis. To ensure that the data is accurate and consistent, conflicting  
129 demographic information about date of birth, gender, and admission and discharge dates was  
130 investigated and resolved.

## 131 **Study Variables**

132 Independent variables considered in the analysis comprised of sociodemographic factors such as  
133 age, employment status, level of education, marital status, and address; obstetric characteristics  
134 such as parity, mode of delivery, place of delivery, duration of labor, duration of hospital stay,  
135 prolonged membrane rupture, antepartum hemorrhage/PPH retained fetal products. Antenatal  
136 attendance, puerperal day of presentation episiotomy, and premature rupture of membranes were  
137 also examined.

138 The dependent variable in this study was puerperal sepsis. Puerperal sepsis was considered in this  
139 study as a mother with a laboratory-based diagnosis with positive bacterial culture results during  
140 the course of postnatal admission. All post-partum mothers had bacterial culture and sensitivity  
141 tests done on their samples as part of routine care with support from development partners.

## 142 **Data collection procedure**

143 Data collection was conducted between 20 February 2024 and 01 April, 2024. We used data  
144 abstraction checklists to retrieve participant information from the hospital records. The predesigned  
145 data abstraction tool consisted of several sections including socio-demographic variables such as  
146 age, marital status, tribe, religion, level of income, level of education, obstetric (parity, mode of  
147 delivery, number of vaginal examinations, obstetric complications such as antepartum hemorrhage,  
148 abnormal labor among others. Data comprising of patient identifiers was not retrieved for any use  
149 in this study.

## 150 **Data entry and management**

151 Extracted data was coded, entered into Microsoft Excel, cleaned, and then imported into STATA  
152 17 where it was analyzed. The used checklists were kept in a safe secure location under lock and  
153 key. The data in the computer was protected using a password.

## 154 **Data Analysis**

155 Descriptive statistics were used to summarize the data, frequencies, and percentages were used to  
156 summarize categorical variables, while mean and standard deviation or median and interquartile  
157 range were used to describe continuous variables. Bivariate analysis was used to determine the  
158 association between the independent variables and the presence of sepsis using a logistic regression  
159 and these were presented in form of odds ratios, confidence intervals and *p* value. Multivariate  
160 analysis was performed for variables with a *p* value of  $\leq 0.05$  at bivariate analysis and clinically  
161 plausible variables with a *p*-value  $> 0.2$ . To adjust for confounding, a *p* value of  $\leq 0.05$  will be used  
162 as measures of association between the prevalence of sepsis and the independent variables.

## 163 **Quality Control Measures**

164 Research assistants were trained regarding the study protocol. A pre-coded data abstraction tool  
165 was pre-tested at local public primary healthcare facility located in the study area to ensure  
166 reliability, consistency and validity appropriate changes made and thereafter used for data  
167 collection. During data collection, checklists were reviewed at the end of each participant data  
168 extraction to ensure accuracy and completeness in the data collected to ensure that corrections were  
169 made in real time. Data was cleaned and stored daily by the principal investigator.

## 170 **Ethical Considerations**

171 Ethical approval was obtained from The AIDS Support Organization (TASO) research ethics  
172 committee, TASO-2024-336. A waiver of consent was given, as data collection involved secondary  
173 data. Administrative approval from Fort portal Regional Referral Hospital and the postnatal ward  
174 in charge was sought. The study was performed based on the ethical principles in the Declaration  
175 of Helsinki 1964. To conduct this study, a waiver of informed consent was granted by the  
176 Independent Ethics Committee on the condition that participant data was de-identified.

## 177 **Results**

### 178 **Sociodemographic characteristics of study participants**

179 The median age of was 25.5 years with an interquartile range (IQR) of 21-30 years (table 1). The  
180 majority of the participants were peasants or unemployed (62%), stopped in primary level of  
181 education (77%), and were in rural areas (68%). Considering obstetric characteristics, nearly a third  
182 (29%) of the participants were primigravid, more than a half (53%) were delivered by caesarean  
183 section, while a majority of them did not have any obstetric complications during pregnancy,  
184 delivery and postpartum.

### 185 **Table 1: Socio-demographic and obstetric characteristics of the study participants**

| Variable | Frequency n=180 | Percentage (%) |
|----------|-----------------|----------------|
|----------|-----------------|----------------|

|                                           |              |      |
|-------------------------------------------|--------------|------|
| Age in complete years (median, IQR)       | 25.5 (21-30) |      |
| Marital status                            |              |      |
| Married                                   | <b>120</b>   | 66.7 |
| Single/separated/widowed                  | 60           | 33.3 |
| Occupation                                |              |      |
| None/Peasant                              | <b>111</b>   | 61.7 |
| Informal/formal employment                | 69           | 38.3 |
| Level of education                        |              |      |
| Primary                                   | <b>139</b>   | 77.2 |
| Secondary/tertiary                        | 41           | 22.8 |
| Residence                                 |              |      |
| Rural                                     | <b>123</b>   | 68.3 |
| Urban                                     | 57           | 31.7 |
| Religion                                  |              |      |
| Anglican                                  | 70           | 38.9 |
| Catholic                                  | <b>88</b>    | 48.9 |
| Others*                                   | 22           | 12.2 |
| Parity                                    |              |      |
| 1                                         | 53           | 29.4 |
| 2-4                                       | <b>113</b>   | 62.8 |
| 5+                                        | 14           | 7.8  |
| Mode of delivery                          |              |      |
| SVD                                       | 84           | 46.7 |
| Caesarean section                         | <b>96</b>    | 53.3 |
| Duration of hospital stay                 | 4 (2-10)     |      |
| History of premature rupture of membranes |              |      |
| No                                        | 117          | 65   |
| Yes                                       | 63           | 35   |
| APH                                       |              |      |

|                                 |            |      |
|---------------------------------|------------|------|
| No                              | <b>166</b> | 92.2 |
| Yes                             | 14         | 7.8  |
| PPH                             |            |      |
| No                              | <b>150</b> | 83.3 |
| Yes                             | 30         | 16.7 |
| Retained products of conception |            |      |
| No                              | <b>155</b> | 86.1 |
| Yes                             | 25         | 13.9 |
| ANC attendance                  |            |      |
| No                              | <b>95</b>  | 52.8 |
| Yes                             | 85         | 47.2 |
| Episiotomy                      |            |      |
| No                              | <b>160</b> | 88.9 |
| Yes                             | 20         | 11.1 |
| Anaemia                         |            |      |
| No                              | <b>156</b> | 86.7 |
| Yes                             | 24         | 13.3 |
| HIV                             |            |      |
| No                              | <b>158</b> | 87.8 |
| Yes                             | 22         | 12.2 |
| UTI                             |            |      |
| No                              | <b>115</b> | 63.9 |
| Yes                             | 65         | 36.9 |

186

### 187 **Prevalence of puerperal sepsis**

188 The prevalence of puerperal sepsis was 24% (43/180) (Fig 1). This underscores that nearly one-  
189 quarter of the women had puerperal sepsis.

190 *Fig 1: A pie chart showing the prevalence of puerperal sepsis at FPRRH*

### 191 **Factors associated with puerperal sepsis**

192 Logistic regression was conducted to study the factors which were significantly associated with  
193 puerperal sepsis. A bivariate logistic regression analysis was conducted (Table 2) to determine the  
194 factors associated with puerperal sepsis. In this analysis, cesarean section deliveries, longer stay in  
195 the hospital, history of premature rupture of membranes, history of antepartum hemorrhage, and  
196 belonging to other religious denominations were significantly associated with increased odds of  
197 getting puerperal sepsis.

198 We conducted multivariate logistic analyses to determine the factors which were significantly  
199 associated with increased odds of acquiring puerperal sepsis. Variables that were significant or were  
200 less than the probability value of 0.2 were included in the bivariate analysis. After controlling for  
201 other variables, duration in the hospital, maternal anemia, and history of antepartum hemorrhage  
202 remained significant in the multivariate analyses (Table 3). The odds of puerperal sepsis increased  
203 by more than 2 times for every unit increase in the number of days in the hospital with a 95%  
204 confidence that the true value lies between 1.5 to 3.4 times.

205 **Table 2: Bivariate analysis of the factors associated with puerperal sepsis**

| Variable                          | Sepsis (no)<br>N=137 | Sepsis (yes)<br>N=43 | OR (95% CI)               | p-value<br>=0.05 |
|-----------------------------------|----------------------|----------------------|---------------------------|------------------|
| Age (median, interquartile range) | 26 (23-30)           | 22 (19-30)           | <b>0.97 (0.918-1.018)</b> | <b>0.206</b>     |
| Marital status                    |                      |                      |                           | 0.324            |
| Married                           | 94 (68.6)            | 26 (60.5)            | Ref                       |                  |
| Single/separated/widowed          | 43 (31.4)            | 17 (38.5)            | 1.43 (0.703-2.907)        |                  |
| Occupation                        |                      |                      |                           | 0.213            |
| None/Peasant                      | 81 (59.1)            | 30 (69.8)            |                           |                  |
| Informal/formal                   | 56 (40.9)            | 13 (30.2)            | 0.627 (0.301-1.306)       |                  |
| Level of education                |                      |                      |                           |                  |
| Primary                           | 106 (77.4)           | 33 (76.7)            |                           |                  |
| Secondary/tertiary                | 31 (22.6)            | 10 (23.3)            | 1.036 (0.46-2.34)         | 0.932            |
| Residence                         |                      |                      |                           |                  |
| Rural                             | 95 (69.3)            | 28 (65.1)            |                           |                  |
| Urban                             | 42 (30.7)            | 15 (34.9)            | 1.212 (0.59-2.50)         | 0.603            |



|                                                                 |            |            |                      |        |
|-----------------------------------------------------------------|------------|------------|----------------------|--------|
| Religion                                                        |            |            |                      |        |
| Anglican                                                        | 59 (43.1)  | 11 (25.6)  |                      |        |
| Catholic                                                        | 66 (48.2)  | 22 (51.2)  | 1.788 (0.780-3.997)  | 0.157  |
| Others*                                                         | 12 (8.8)   | 10 (23.3)  | 4.470 (1.552-12.871) | 0.006  |
| Parity                                                          |            |            |                      |        |
| 1                                                               | 37 (27.0)  | 16 (37.2)  |                      |        |
| 2-4                                                             | 89 (65)    | 24 (55.8)  | 0.623 (0.298-1.307)  | 0.211  |
| 5+                                                              | 11 (8.0)   | 3 (7)      | 0.631 (0.155-2.570)  | 0.520  |
| Mode of delivery                                                |            |            |                      |        |
| SVD                                                             | 74 (54)    | 10 (23.3)  |                      |        |
| Caesarean section                                               | 63 (46)    | 33 (76.7)  | 3.876 (1.771-8.483)  | 0.001  |
| Duration of hospital stay in days (median, interquartile range) | 3 (1-4)    | 16 (14-18) | 1.80(1.490-2.176)    | <0.001 |
| History of premature rupture of membranes                       |            |            |                      |        |
| No                                                              | 101 (73.7) | 16 (37.2)  |                      |        |
| Yes                                                             | 36 (26.3)  | 27 (62.8)  | 4.734 (2.290-9.785)  | <0.001 |
| APH                                                             |            |            |                      |        |
| No                                                              | 131 (95.6) | 35 (81.4)  |                      | 0.005  |
| Yes                                                             | 6 (4.4)    | 8 (18.6)   | 4.990 (1.624-15.330) |        |
| PPH                                                             |            |            |                      | 0.314  |
| No                                                              | 112 (81.8) | 38 (88.4)  |                      |        |
| Yes                                                             | 25 (18.2)  | 5 (11.6)   | 0.589 (0.211-1.648)  |        |
| Retained products of conception                                 |            |            |                      | 0.604  |
| No                                                              | 119 (86.9) | 36 (83.7)  |                      |        |
| Yes                                                             | 18 (13.1)  | 7 (16.3)   | 1.285 (0.497-3.322)  |        |

|                           |            |           |                     |       |
|---------------------------|------------|-----------|---------------------|-------|
| ANC attendance            |            |           |                     | 0.420 |
| No                        | 70 (51.1)  | 25 (58.1) |                     |       |
| Yes                       | 67 (48.9)  | 18 (41.9) | 0.752 (0.376-1.503) |       |
| Episiotomy                |            |           |                     | 0.902 |
| No                        | 122 (89.1) | 38 (88.4) |                     |       |
| Yes                       | 15 (10.9)  | 5 (11.6)  | 1.070 (0.365-3.137) |       |
| Diabetes in pregnancy     |            |           |                     | 0.904 |
| No                        | 130 (94.9) | 41(95.3)  |                     |       |
| Yes                       | 7 (5.1)    | 2 (4.7)   | 0.906 (0.181-4.533) |       |
| Anemia                    |            |           |                     | 0.098 |
| No                        | 122 (89)   | 34 (79.1) |                     |       |
| Yes                       | 15 (11)    | 9 (20.9)  | 2.153 (0.867-5.346) |       |
| HIV                       |            |           |                     | 0.505 |
| No                        | 119 (86.9) | 39 (90.7) |                     |       |
| Yes                       | 18 (13.1)  | 4 (9.3)   | 0.678 (0.216-2.125) |       |
| UTI                       |            |           |                     | 0.106 |
| No                        | 92 (67.1)  | 23 (53.5) |                     |       |
| Yes                       | 45 (32.9)  | 20 (46.5) | 1.778 (0.885-3.570) |       |
| Hypertension in pregnancy |            |           |                     | 0.926 |
| No                        | 128 (93.4) | 40 (93)   |                     |       |
| Yes                       | 9 (6.6)    | 3 (7)     | 1.067 (0.275-4.131) |       |

206

## 207 Discussion

208 According to this study, the prevalence of sepsis at Fort Portal Regional Referral Hospital was 24%.  
 209 This might be related to poor aseptic techniques, improper wound management practices, education  
 210 provided to patients upon discharge, and an unhygienic hospital environment. Although this study  
 211 shows a relatively higher prevalence than in a Uganda National Referral Hospital (Mulago National  
 212 Referral Hospital) which reported a 12.7% [19], it is in line with the study done in Bushenyi among  
 213 mothers who delivered at Kampala International University Teaching Hospital which found the

214 prevalence to be 20.9%.[20] The findings of our study are also in line with the pooled prevalence  
215 of puerperal sepsis among postnatal women in Sub-Saharan Africa at 19.21% done by.[21]

216 Cesarean section as a mode of delivery was a significant factor associated with sepsis in our study.  
217 This could be attributed to poor perioperative aseptic techniques, poor wound care practices of  
218 health care workers in post-natal units, and an unhygienic hospital environment. Poor surgical hand  
219 scrubbing techniques and insufficient surgical site scrubbing and disinfection may potentially lead  
220 to introduction of pathogenic microorganisms which cause post cesarean section infection. This is  
221 in line with a study conducted in different regions from Hoima Regional Referral Hospital,[22]  
222 Hawassa city, Ethiopia,[23] and Tanzania [14] that revealed that having a cesarean section was  
223 associated with puerperal sepsis. However, this study contradicts a study that was conducted in  
224 Brazil which showed mothers who delivered by caesarean section were actually less likely to  
225 develop puerperal sepsis. [24]

226 Findings from our study also show that anemia significantly increased the risk of puerperal sepsis.  
227 This could be attributed to poor maternal nutrition before and/or during pregnancy as well as  
228 pregnancy related infectious diseases such as malaria which is endemic in the study area. These  
229 conditions may reduce the immunity and increase susceptibility of the pregnant mother to  
230 infections. This finding is in agreement with a study conducted in Ethiopia. [25] Our results, which  
231 indicated that anemia was a significant contributing factor to puerperal sepsis, are contradicted by  
232 a study done in 2024 at the Kawempe National Referral Hospital. [26]

233 In addition, our study shows that duration of hospital stay was a significant contributing factor to  
234 the prevalence of puerperal sepsis. The justification for the increased risk of puerperal sepsis in  
235 women who stay longer in hospital is the unhygienic hospital environment, poor aseptic processes,  
236 and hospital-acquired pathogens and infections are prevalent in the wards where the postpartum  
237 mothers are admitted during hospital stays. These results are in line with a study conducted in  
238 Ethiopia which established that prolonged hospital stay increased the risk of infection. [25]

239 The study found that a history of antepartum hemorrhage (APH) was significantly associated with  
240 puerperal sepsis and this study is congruent with another study conducted in the same hospital. [27]  
241 These findings are in line with the results of a Five-Year Review of Feto-maternal outcomes of  
242 Antepartum hemorrhage in a tertiary center in Nigeria which found that APH was a significant  
243 predictor of puerperal sepsis among post-natal mothers. [28] APH occurs due to trauma and  
244 abnormalities of the placenta and uterus and often requires emergency modalities of delivery which  
245 may put the mother at risk of puerperal sepsis.

## 246 **Study limitations**

247 Our study used secondary data retrieved from patients' files. Owing to the inherent nature of such  
248 data whose primary purpose was not to answer a specific research question, some patient files  
249 lacked critical data on certain variables. We did not include patient files that had missing data on  
250 any of the proposed research variables.

## 251 **Conclusion and recommendations**

252 This investigation identified the following as risk factors for puerperal sepsis, antepartum  
253 hemorrhage, anemia, prolonged hospital stays, and mode of delivery. Thus, we advise obstetric care  
254 providers to strictly adhere to asepsis guidelines in the management of women who are likely to  
255 experience puerperal sepsis. In addition, medical professionals should manage these patients

256 appropriately to reduce hospital stays and offer thorough prenatal education, with a focus on the  
257 significance and adherence to iron supplementation.

## 258 **Acknowledgments**

259 We acknowledge the financial support obtained from the Mountains of the Moon University  
260 Research and Innovation Fund.

261 We are grateful for the support provided by Fort Portal Regional Referral Hospital's administration  
262 and staff, especially the ones working in the postnatal ward. We also want to express our gratitude  
263 to our research assistants who reviewed documents to obtain the data.

264

## 265 **References**

- 266 1. WHO. (1995). *The prevention and management of puerperal infections: report of a*  
267 *technical working group, Geneva, 20-22 May 1992.*
- 268 2. Demisse, G. A., Sifer, S. D., Kedir, B., Fekene, D. B., & Bulto, G. A. (2019). Determinants  
269 of puerperal sepsis among postpartum women at public hospitals in west SHOA zone  
270 Oromia regional STATE, Ethiopia (institution BASEDCASE control study). *BMC*  
271 *pregnancy and childbirth*, 19, 1-6.
- 272 3. Madhudasa, C., Khurshid, F., & Sirichand, P. (2011). Maternal morbidity and mortality  
273 associated with puerperal sepsis. *JLUMHS*, 10(03), 121.
- 274 4. Refai, N., Patil, V., & Gomaa, H. (2019). Update in obstetric maternal sepsis. *Obstetric*  
275 *Anaesthesia*, 71.
- 276 5. Turner, M. J. (2019). Maternal sepsis is an evolving challenge. *International Journal of*  
277 *Gynecology & Obstetrics*, 146(1), 39-42.
- 278 6. Miller, A. E., Morgan, C., & Vyankandondera, J. (2013). Causes of puerperal and neonatal  
279 sepsis in resource-constrained settings and advocacy for an integrated community-based  
280 postnatal approach. *International Journal of Gynecology & Obstetrics*, 123(1), 10-15.
- 281 7. WHO. (2015). *Trends in maternal mortality: 1990-2015: estimates from WHO, UNICEF,*  
282 *UNFPA, world bank group and the United Nations population division.* World Health  
283 Organization.
- 284 8. Kehoe, S., Neilson, J., & Norman, J. (2010). *Maternal and infant deaths: chasing*  
285 *millennium development goals 4 and 5.* RCOG.
- 286 9. van Dillen, J., Zwart, J., Schutte, J., & van Roosmalen, J. (2010). Maternal sepsis:  
287 epidemiology, etiology and outcome. *Current opinion in infectious diseases*, 23(3), 249-  
288 254.
- 289 10. UDHS. (2023). Uganda Health Demography Survey. 50.
- 290 11. Ngonzi, J., Bebell, L. M., Fajardo, Y., Boatman, A. A., Siedner, M. J., Bassett, I. V.,  
291 Jacquemyn, Y., Van Geertruyden, J.-P., Kabakyenga, J., & Wylie, B. J. (2018). Incidence  
292 of postpartum infection, outcomes and associated risk factors at Mbarara regional referral  
293 hospital in Uganda. *BMC pregnancy and childbirth*, 18, 1-11.
- 294 12. Alvah, I. B. (2023). Determinants of Puerperal Sepsis Incidence at Hoima Regional Referral  
295 Hospital in Hoima District, Western Uganda.
- 296 13. Latchman, A. (2020). *Transitioning to Sustainable Development Goal 3: An intersectional*  
297 *approach examining maternal health policy in Uganda*

- 298 14. Kajeguka, D. C., Mrema, N. R., Mawazo, A., Malya, R., & Mgabo, M. R. (2020). Factors  
299 and causes of Puerperal Sepsis in Kilimanjaro, Tanzania: A descriptive study among  
300 postnatal women who attended Kilimanjaro Christian Medical Centre. *The East African*  
301 *Health Research Journal*, 4(2), 158.
- 302 15. Dare, F., Bako, A., & Ezechi, O. (1998). Puerperal sepsis: a preventable post-partum  
303 complication. *Tropical Doctor*, 28(2), 92-95.
- 304 16. Ahmed, S., Yousaf, M., Mothana, R. A., & Al-Rehaily, A. J. (2016). Studies on wound  
305 healing activity of some Euphorbia species on experimental rats. *African Journal of*  
306 *Traditional, Complementary and Alternative Medicines*, 13(5), 145-152.
- 307 17. Admas, A., Gelaw, B., BelayTessema, Worku, A., & Melese, A. (2020). The proportion of  
308 bacterial isolates, their antimicrobial susceptibility profile,, and factors associated with  
309 puerperal sepsis among post-partum/aborted women at a referral Hospital in Bahir Dar,  
310 Northwest Ethiopia. *Antimicrobial Resistance & Infection Control*, 9, 1-10.
- 311 18. Khaskheli, M.-N., Baloch, S., & Sheeba, A. (2013). Risk factors and complications of  
312 puerperal sepsis at a tertiary healthcare center. *Pakistan journal of medical sciences*, 29(4),  
313 972.
- 314 19. Wandabwa, J.N., Doyle, P., Longo-Mbenza, B. *et al.* Human immunodeficiency virus and  
315 AIDS and other important predictors of maternal mortality in Mulago Hospital Complex  
316 Kampala Uganda. *BMC Public Health* 11, 565 (2011). [https://doi.org/10.1186/1471-2458-](https://doi.org/10.1186/1471-2458-11-565)  
317 11-565
- 318 20. Senyonga Harunah, Assessments of Puerperal Sepsis in Women at Kampala International  
319 University Teaching Hospital Western Campus, Uganda. 2023.
- 320 21. Traoré, F. B., Sidibé, C. S., Diallo, E. H. M., Camara, B. S., Sidibé, S., Diallo, A., Diarra,  
321 N. H., Ly, B. A., Ag Ahmed, M. A., Kayentao, K., Touré, A., Camara, A., Delamou, A.,  
322 Sangho, H., & Terera, I. (2024). Prevalence and factors associated with maternal and  
323 neonatal sepsis in sub-Saharan Africa: a systematic review and meta-analysis. In *Frontiers*  
324 *in Public Health* (Vol. 12). Frontiers Media SA.  
325 <https://doi.org/10.3389/fpubh.2024.1272193>
- 326 22. Andrew N. Factors Influencing Pueperal Sepsis among Postpartum Women at Hoima  
327 Regional Referral Hospital, in Hoima District Western Uganda August 2023  
328 DOI: [10.59298/IDOSRJSR/2023/00.2.6000](https://doi.org/10.59298/IDOSRJSR/2023/00.2.6000)
- 329 23. Tesfaye T, Samuel S, Lera T. Determinants of puerperal sepsis among postpartum women  
330 at public hospitals of Hawassa city, Southern Ethiopia: Institution-based unmatched case-  
331 control study. *Heliyon*. 2023 Mar 23;9(4):e14809. doi: 10.1016/j.heliyon.2023.e14809.  
332 PMID: 37025872; PMCID: PMC10070673.
- 333 24. K.C. Mascarello, B.L. Horta, M.F. Silveira, Maternal complications and cesarean section  
334 without indication: systematic review and meta-analysis, *Rev. Saude Publica* 51 (2017) 105.
- 335 25. Oyato BT, Debele T, Edosa D, Abasimel HZ, Awol M, Kebede ET, Gezahagn A, Desta  
336 AA, Alemu FT, Asfaw SB. Determinants of puerperal sepsis among postpartum women: a  
337 case-control study in East Shoa Zone public hospitals, Central Ethiopia. *BMJ Open*. 2024  
338 Jun 21;14(6):e083230. doi: 10.1136/bmjopen-2023-083230. PMID: 38908838
- 339 26. Ainebyona, H.; Ayebare, E.; Nabisere, A.; Saftner, M.A. Prevalence of Maternal Fever and  
340 Associated Factors among Postnatal Women at Kawempe National Referral Hospital,  
341 Uganda: A Preliminary Study. *Int. J. Environ. Res. Public Health* 2024, 21, 316.  
342 <https://doi.org/10.3390/ijerph21030316>
- 343 27. Geraldine, E. (2023). Prevalence and Factors Associated with Puerperal Sepsis among  
344 Women Attending the Postnatal Ward at Fort Portal Regional Referral Hospital. IAA

345 Journal of Applied Sciences, 10(2), 13–22.  
346 <https://doi.org/10.59298/IAAJAS/2023/2.2.1100>.  
347 28. Oguejiofor CB, Okafor CD, Eleje GU, Ikechebelu JI, Okafor CG, Ugboaja JO, Ogabido  
348 CA, Njoku TK, Umeononihu OS, Okpala BC, Nwankwo ME, Ezeigwe CO, Enechukwu  
349 CI, Eke AC. A Five-Year Review of Feto-Maternal Outcome of Antepartum Haemorrhage  
350 in a Tertiary Center. Int J Innov Res Med Sci. 2023 Mar;8(3):96-101. doi:  
351 10.23958/ijirms/vol08-i03/1637. Epub 2023 Mar 16. PMID: 37006445; PMCID:  
352 PMC10066273.  
353  
354  
355

Figure 1: Prevalence of Puerperal sepsis

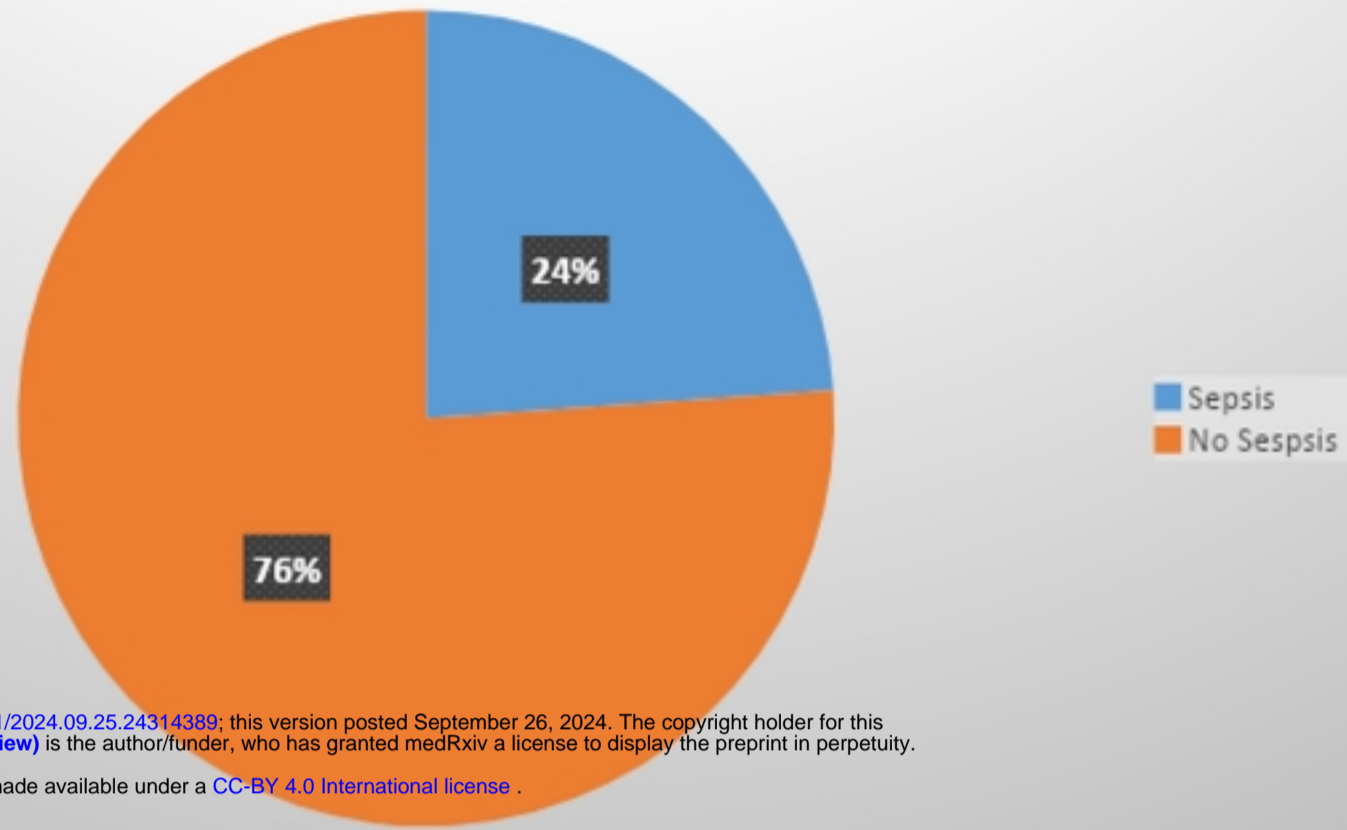

medRxiv preprint doi: <https://doi.org/10.1101/2024.09.25.24314389>; this version posted September 26, 2024. The copyright holder for this preprint (which was not certified by peer review) is the author/funder, who has granted medRxiv a license to display the preprint in perpetuity.

It is made available under a [CC-BY 4.0 International license](https://creativecommons.org/licenses/by/4.0/).
